# Supplementary material for: A Novel 3-Gene Signature for Identifying COVID-19 Patients Based on Bioinformatics and Machine Learning
Source: MDPI journal article supplement (doi:10.3390/genes13091602), 2022-09-08
Supplement: s1 [file s1]

**Table S1.** The findings from recent state of the art.

| Title                                                                                                                                                                        | Dataset   | Methods Used                                                        | Evaluation Metrics                                                                             | Research Challenges                                                                                  |
|------------------------------------------------------------------------------------------------------------------------------------------------------------------------------|-----------|---------------------------------------------------------------------|------------------------------------------------------------------------------------------------|------------------------------------------------------------------------------------------------------|
| m6A<br>Regulator-Mediated<br>Methylation<br>Modification Patterns<br>and Characteristics of<br>Immunity in Blood<br>Leukocytes of<br>COVID-19 Patients                       | GSE157103 | Limma, GSVA,<br>CIBERSORT, PCA,<br>LASSO                            | true-positive fraction,<br>false-positive fraction                                             | To reveal m6A methylation<br>modification of leukocyte<br>response to viral infection in<br>COVID-19 |
| XGBoost-Based Feature<br>Learning Method for<br>Mining COVID-19<br>Novel Diagnostic<br>Markers                                                                               | GSE152075 | edgR, XGBoost,<br>MARS, KNN, SVM,<br>MLP, RF, PCA, GO,<br>KEGG      | feature importance<br>ranking, recursive<br>elimination, IFS method                            | To identify some potential<br>biomarkers for COVID-19<br>through XGBoost algorithm                   |
| m6A<br>Regulator-Mediated<br>Methylation<br>Modification<br>Patterns and<br>Characteristics in<br>COVID-19 Patients                                                          | GSE157103 | Limma, RF, SVM,<br>GO, PCA, ssGSEA                                  | sensitivity, 1-specificity                                                                     | To investigate the potential<br>roles of m6A regulators in<br>COVID-19                               |
| Integrated COVID-19<br>Predictor: Differential<br>expression analysis to<br>reveal potential<br>biomarkers and<br>prediction of<br>coronavirus using<br>RNA-Seq profile data | GSE152641 | Limma, SVM, kNN,<br>Naïve Bayes,<br>Random Forest,<br>Decision Tree | classification, accuracy,<br>sensitivity, specificity,<br>precision, FPR, NPV,<br>RMC, F1, AUC | To develop a COVID-19<br>predictor with high predictive<br>value                                     |

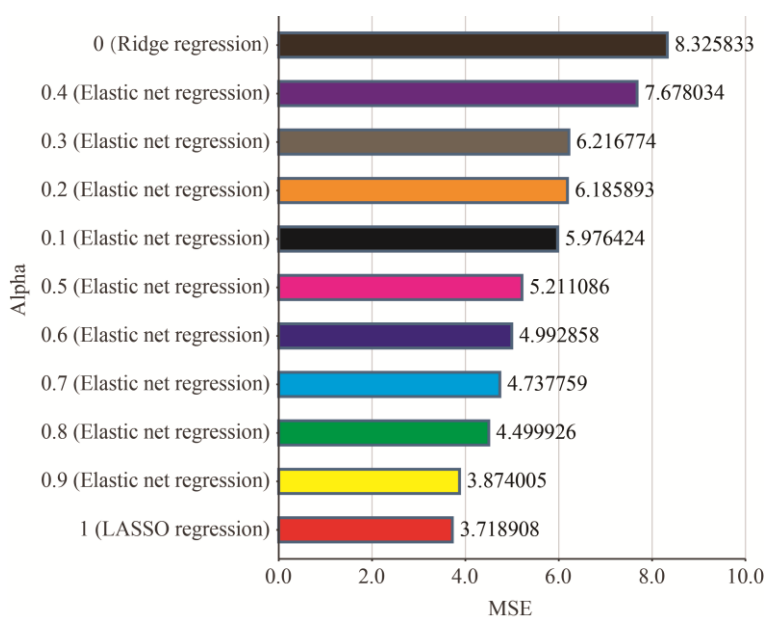

**Figure S1.** Comparison of LASSO regression, ridge regression, and elastic net regression for identifying COVID-19.

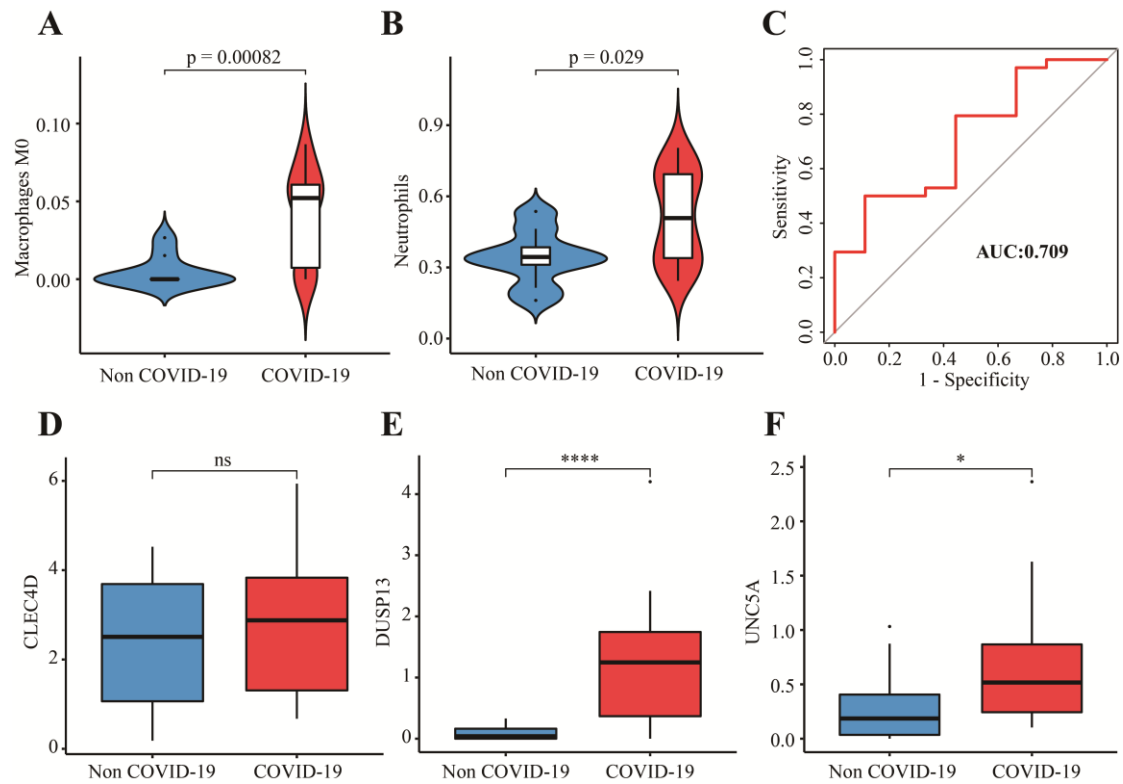

**Figure S2.** Validation of two important immune cells and 3-gene signature in GSE196822. (A) Comparison of M0 macrophages between COVID-19 and non-COVID-19 groups. (B) Comparison of Neutrophils between COVID-19 and non-COVID-19 groups. (C) The AUC for prediction of outcome. (D-F) The expressions of CLEC4D, DUSP13 and UNC5A between COVID-19 and non-COVID-19 groups. Data in (D-F) were analyzed by Wilcoxon test; ns, no significance; \* $p < 0.05$ , \*\* $p < 0.01$ , \*\*\* $p < 0.001$  and \*\*\*\* $p < 0.0001$ .
