# Supplementary material for: A Novel 3-Gene Signature for Identifying COVID-19 Patients Based on Bioinformatics and Machine Learning
Source: Genes (Basel). 2022 Sep 8;13(9):1602. doi: 10.3390/genes13091602 (PMC9498787; doi:10.3390/genes13091602)
Supplement: Supplementary file 1 [file genes-13-01602-s001.zip]

Archive with 4 entries (4 files):
- Figure S1.tif
- Figure S2.tif
- Supplementary table and figures.pdf
- Table S1.xlsx
