# Supplementary material for: A Novel 3-Gene Signature for Identifying COVID-19 Patients Based on Bioinformatics and Machine Learning
Source: Genes (Basel). 2022 Sep 8;13(9):1602. doi: 10.3390/genes13091602 (PMC9498787; doi:10.3390/genes13091602)
Supplement: Supplementary file 1 [file genes-13-01602-s001.zip › Table S1.xlsx]

## Sheet: Sheet1
Title	Dataset	Methods Used	Evaluation Metrics	Research Challenges
m6A Regulator-Mediated Methylation Modification Patterns and Characteristics of Immunity in Blood Leukocytes of COVID-19 Patients	GSE157103	Limma, GSVA, CIBERSORT, PCA, LASSO	true positive fraction, false positive fraction	To reveal m6A methylation modification of leukocytes responds to the virus infection in COVID-19
XGBoost-Based Feature Learning Method for Mining COVID-19 Novel Diagnostic Markers	GSE152075	edgR, XGBoost, MARS, KNN, SVM, MLP, RF, PCA, GO, KEGG	feature importance ranking, recursive elimination, IFS Method	To identify some potential biomarkers for COVID-19 through XGBoost algorithm
m6A Regulator-Mediated Methylation Modification Patterns and Characteristics in COVID-19 Patients	GSE157103	Limma, RF, SVM, GO, PCA, ssGSEA	sensitivity, 1-specificity	To investigate the potential roles of m6A regulators in coronavirus disease 2019 (COVID-19)
Integrated COVID-19 Predictor: Differential expression analysis to reveal potential biomarkers and prediction of coronavirus using RNA-Seq profile data	GSE152641	Limma, SVM, kNN, Naïve Bayes, Random Forest, Decision Tree	Classification, Accuracy, Sensitivity, Specificity, Precision, FPR, NPV, RMC, F1, AUC	To develop a COVID-19 predictor with high predictive value
